# Supplementary material for: Determination of robenidine in shrimp and chicken samples using the indirect competitive enzyme-linked immunosorbent assay and immunochromatographic strip assay
Source: Royal Society of Chemistry journal article supplement (doi:10.1039/d0an01783c), 2020-11-03
Supplement: d0an01783c1.pdf [file d0an01783c1.pdf]

**Determination of robenidine in shrimp, and chicken samples  
using indirect competitive enzyme-linked immunosorbent  
assay and immunochromatographic strip assay  
(Supplementary Material)**

## Contents

**Fig. S1.** Synthesis of the hapten for robenidine hydrochloride.

**Fig. S2.** Characterization of the ROBH hapten. (A) The structures and full scan mass spectra of ROBH hapten; (B)  $^1\text{H}$ -NMR spectra; (C)  $^{13}\text{C}$ -NMR spectra.

**Fig. S3.** MALDI-TOF mass spectrum of proteins and conjugates. (A) BSA (black), ROBH-BSA 50:1 (red), ROBH-BSA 100:1 (green), and ROBH-BSA 200:1 (blue). The hapten loadings were respectively 12.6, 16.1, and 17.1. (B) OVA (black) and ROBH-OVA 30:1 (red). The hapten loading was 4.1.

**Fig. S4.** Complete inhibition curves of the four monoclonal antibodies. (A) 1H6; (B) 5D2; (C) 10B8; (D) 12C9.

**Fig. S5.** Matrix effect for ic-ELISA and immunochromatographic strip assay. (A) ROBH standard curves in PBS and diluted samples (★ PBS solution, ● tenfold dilution for shrimp sample, ◆ tenfold dilution for chicken breast sample, ▼ tenfold dilution for chicken liver sample); (B) PBS solution; (C) shrimp sample; (D) chicken breast sample; (E) chicken liver sample (1=0 ng/g, 2=10 ng/g).

**Table S1.** Titer and specificity screening of antisera.

**Table S2.** Screening of hybridoma cell lines.

**Table S3.** Curve parameters of the four monoclonal antibodies.

**Table S4.** The cross reaction rates with anticoccidial drugs.

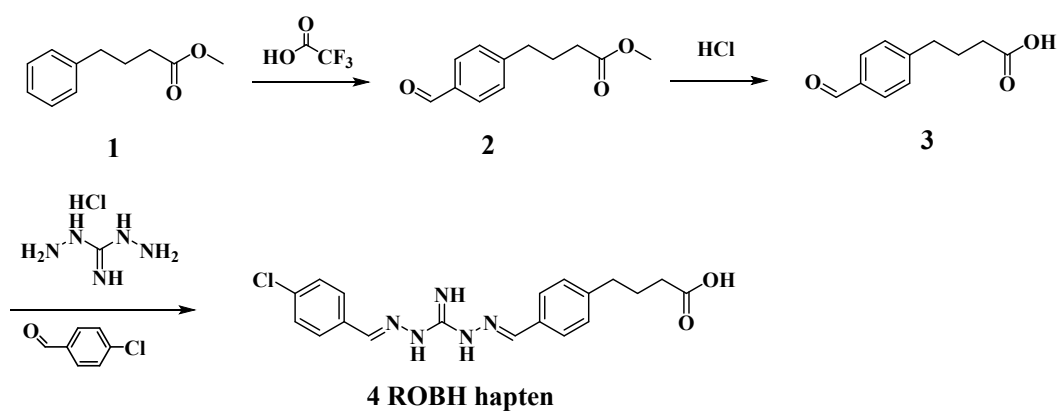

**Fig. S1.** Synthesis of the haptin for robenidine hydrochloride.

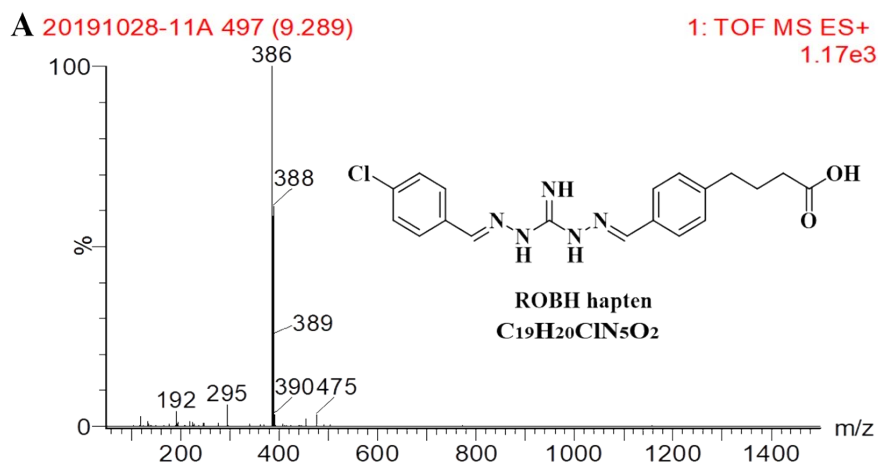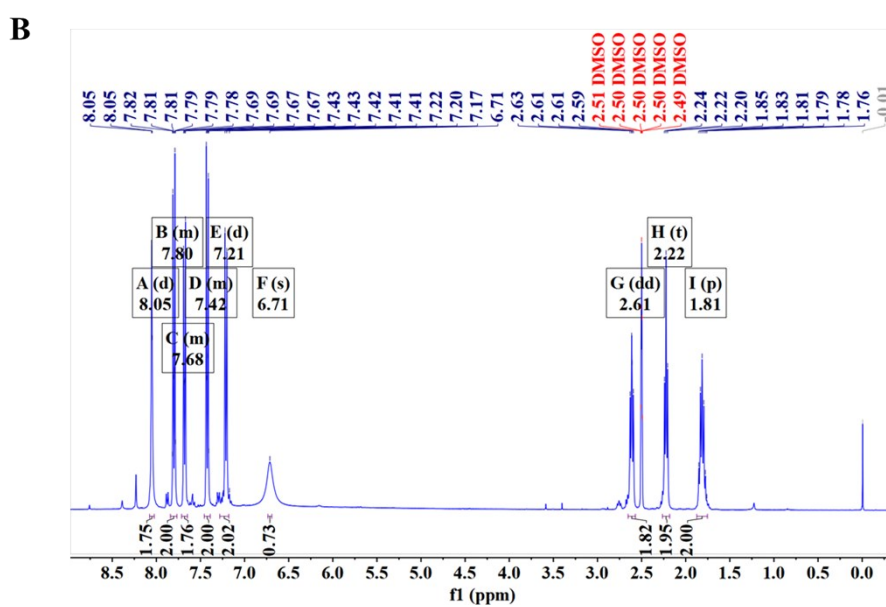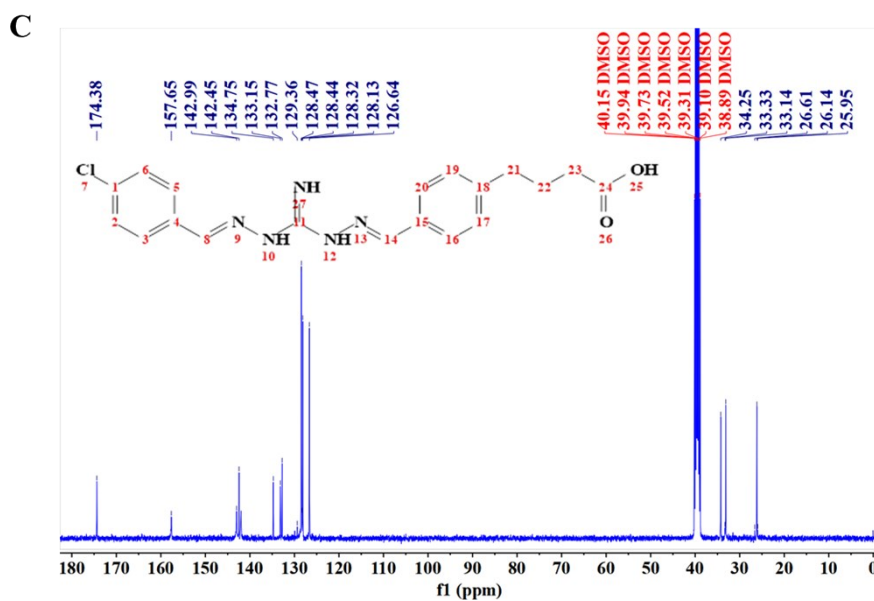

**Fig. S2.** Characterization of the ROBH hapten. (A) The structures and full scan mass spectra of ROBH hapten; (B)  $^1H$ -NMR spectra; (C)  $^{13}C$ -NMR spectra.

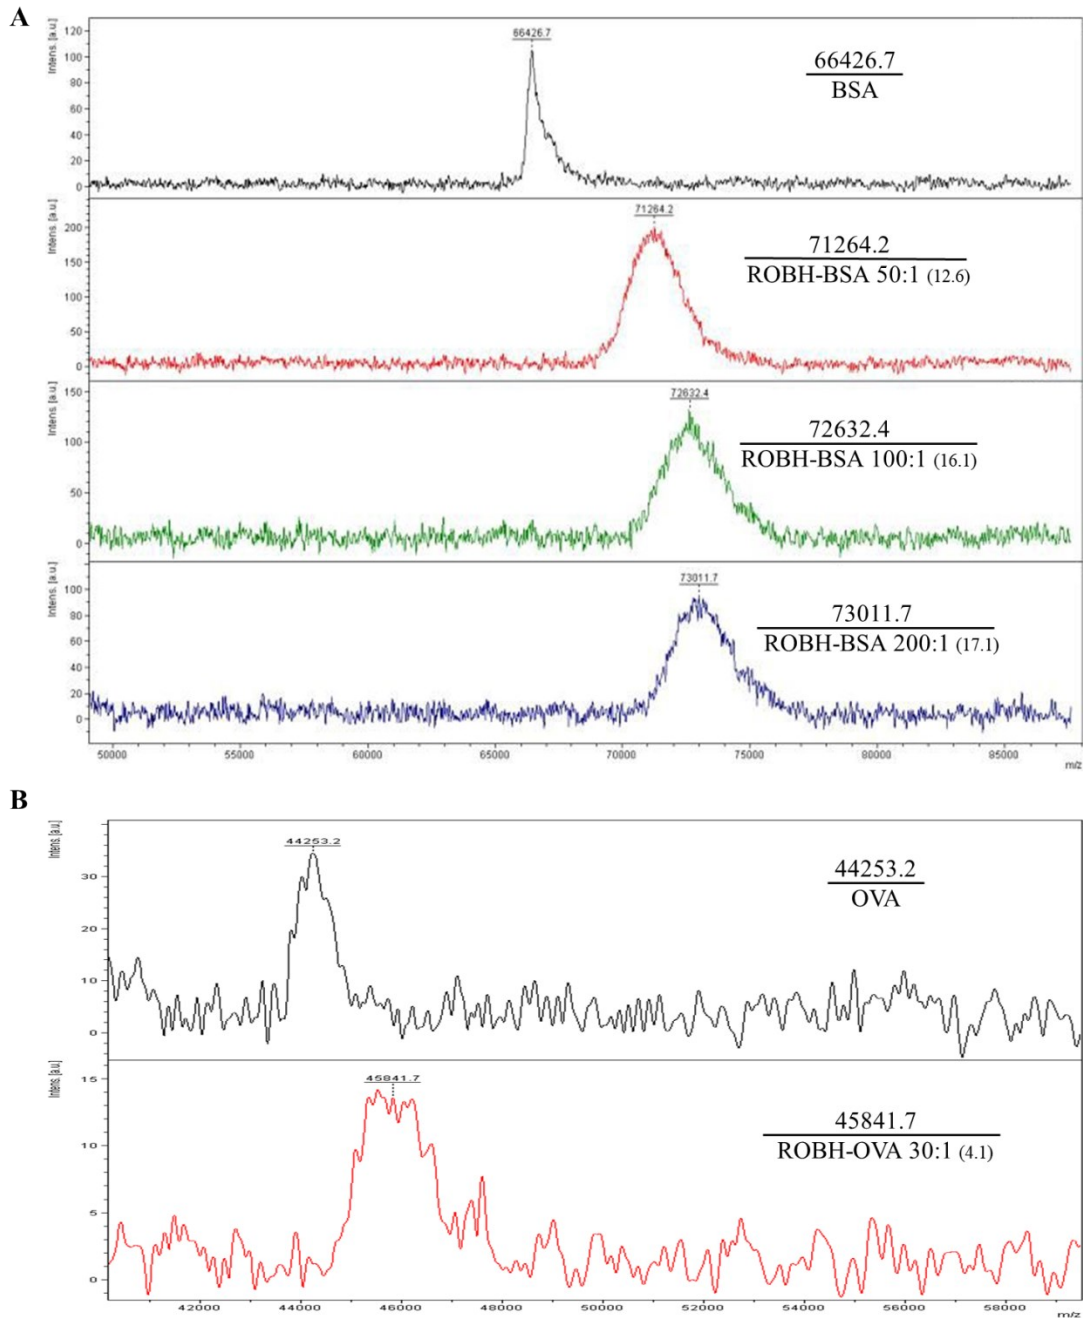

**Fig. S3.** MALDI-TOF mass spectrum of proteins and conjugates. (A) BSA (black), ROBH-BSA 50:1 (red), ROBH-BSA 100:1 (green), and ROBH-BSA 200:1 (blue). The hapten loadings were respectively 12.6, 16.1, and 17.1. (B) OVA (black) and ROBH-OVA 30:1 (red). The hapten loading was 4.1.

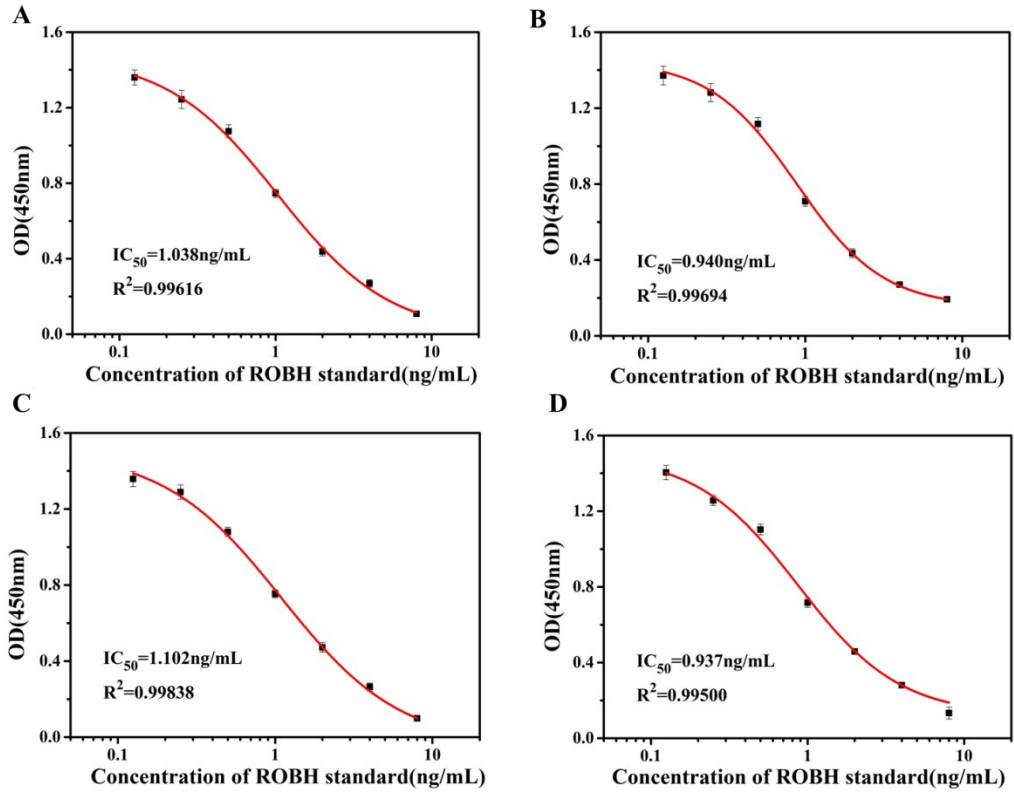

**Fig. S4.** Complete inhibition curves of the four monoclonal antibodies. (A) 1H6; (B) 5D2; (C) 10B8; (D) 12C9.

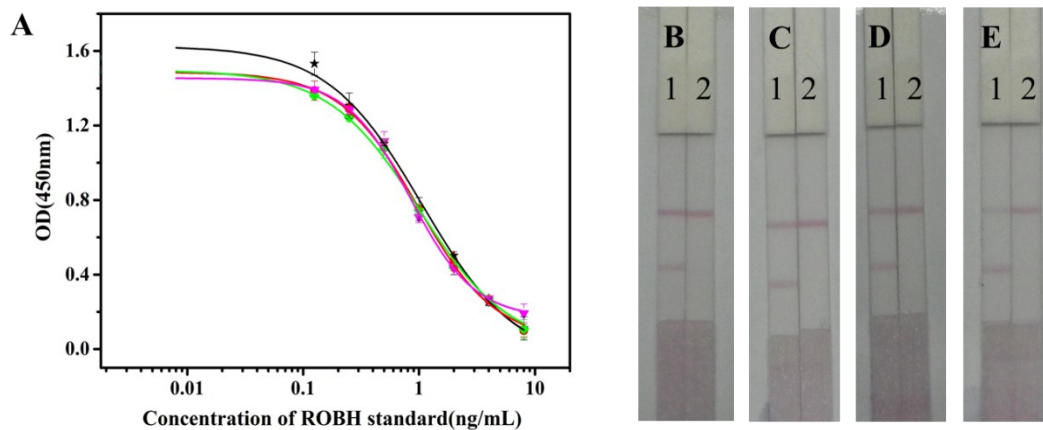

**Fig. S5.** Matrix effect for ic-ELISA and immunochromatographic strip assay. (A) ROBH standard curves in PBS and diluted samples (★ PBS solution, ● tenfold dilution for shrimp sample, ◆ tenfold dilution for chicken breast sample, ▼ tenfold dilution for chicken liver sample); (B) PBS solution; (C) shrimp sample; (D) chicken breast sample; (E) chicken liver sample (1=0 ng/g, 2=10 ng/g).

**Table S1.** Titer and specificity screening of antisera.

| Immunogen<br>(X:1) | Coating<br>antigen<br>( $\mu\text{g/mL}$ ) | Standard<br>Concentration<br>( $\text{ng/mL}$ ) | Titres(1:X<br>) |            |            |            |            | (B <sub>0</sub> -<br>B)/B <sub>0</sub><br>$\times 100\%$ |            |            |            |            |
|--------------------|--------------------------------------------|-------------------------------------------------|-----------------|------------|------------|------------|------------|----------------------------------------------------------|------------|------------|------------|------------|
|                    |                                            |                                                 | Mouse<br>1      | Mouse<br>2 | Mouse<br>3 | Mouse<br>4 | Mouse<br>5 | Mouse<br>1                                               | Mouse<br>2 | Mouse<br>3 | Mouse<br>4 | Mouse<br>5 |
| 50                 | 0.3                                        | 100                                             | 1000            | 3000       | 3000       | 1000       | 3000       | 25                                                       | 33         | 55         | 36         | 45         |
|                    | 0.1                                        | 50                                              | 3000            | 9000       | 9000       | 3000       | 3000       | 30                                                       | 35         | 60         | 33         | 40         |
|                    | 0.1                                        | 20                                              | 9000            | 9000       | 9000       | 3000       | 3000       | 41                                                       | 40         | 78         | 36         | 47         |
| 100                | 0.3                                        | 100                                             | 3000            | 1000       | 1000       | 1000       | 3000       | 18                                                       | 20         | 21         | 19         | 22         |
|                    | 0.3                                        | 50                                              | 3000            | 3000       | 3000       | 1000       | 3000       | 25                                                       | 22         | 25         | 23         | 26         |
|                    | 0.1                                        | 20                                              | 3000            | 9000       | 9000       | 3000       | 3000       | 30                                                       | 31         | 33         | 36         | 35         |
| 200                | 0.3                                        | 100                                             | 1000            | 1000       | 1000       | 1000       | 1000       | 26                                                       | 30         | 29         | 31         | 34         |
|                    | 0.3                                        | 50                                              | 3000            | 3000       | 3000       | 3000       | 3000       | 30                                                       | 32         | 35         | 35         | 36         |
|                    | 0.1                                        | 20                                              | 9000            | 3000       | 9000       | 3000       | 3000       | 33                                                       | 40         | 42         | 38         | 40         |



**Table S2.** Screening of hybridoma cell lines.

| Hybridoma cell lines | Coating antigen ( $\mu\text{g}/\text{mL}$ ) | Titres (1:X) | (B <sub>0</sub> -B)/B <sub>0</sub> ×100% values |                |                |
|----------------------|---------------------------------------------|--------------|-------------------------------------------------|----------------|----------------|
|                      |                                             |              | ROBH (5 ng/mL)                                  | ROBH (2 ng/mL) | ROBH (1 ng/mL) |
| 1H6                  | 0.1                                         | 27           | 0.65                                            | 0.50           | 0.50           |
| 5D2                  | 0.1                                         | 9            | 0.58                                            | 0.53           | 0.57           |
| 10B8                 | 0.1                                         | 27           | 0.68                                            | 0.55           | 0.51           |
| 12C9                 | 0.1                                         | 81           | 0.60                                            | 0.54           | 0.52           |

**Table S3.** Curve parameters of the four monoclonal antibodies.

| ROBH-OVA (30:1)                          |       |       |       |       |
|------------------------------------------|-------|-------|-------|-------|
| Monoclonal antibody No.                  | 1H6   | 5D2   | 10B8  | 12C9  |
| Coating antigen ( $\mu\text{g/mL}$ )     | 0.3   | 1.0   | 0.3   | 0.1   |
| Monoclonal antibody ( $\mu\text{g/mL}$ ) | 0.3   | 0.3   | 0.3   | 0.1   |
| OD <sub>max</sub>                        | 1.518 | 1.452 | 1.494 | 1.509 |
| IC <sub>50</sub>                         | 1.038 | 0.940 | 1.102 | 0.937 |

**Table S4.** The cross reaction rates with anticoccidial drugs.

| Anticoccidial drugs      | Structure                                                                           | IC <sub>50</sub> (ng/mL) | CR (100%) |
|--------------------------|-------------------------------------------------------------------------------------|--------------------------|-----------|
| Robenidine hydrochloride | 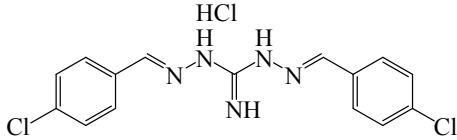   | 0.927                    | 100       |
| Diclazuril               |    | —                        | <0.1      |
| Toltrazuril              |    | —                        | <0.1      |
| Halofuginone             |   | —                        | <0.1      |
| Clopidol                 |  | —                        | <0.1      |
| Amprolium Hydrochloride  |  | —                        | <0.1      |
| Lasalocid                |  | —                        | <0.1      |
| Monensin                 |  | —                        | <0.1      |
